# Supplementary material
Source: publisher figshare collection journal article supplement (https://geolsoc.figshare.com/ndownloader/files/30438353)
Supplement: Supplementary file 1 [file 30438353]

## Sheet: Curtin University
U-Pb ages of xenogenic zircons from Ingashi dyke 1 (Iskra) obtained at CCFS/GEMOC, Macquarie University (Australia).
	Concentration (ppm)			CORRECTED AGES (Ma)
Analysis	Th	U	Th/U	Pb207/Pb206	1s	Pb207/U235	1s	Pb206/U238	1s	Pb208/Th232	1s
IN-62	214.887	362.92	0.592107	397	38	305	4	293	2	204	4
IN-185	69.6822	167.07	0.417083	556	41	330	5	299	4	274	5
IN-150	78.5549	154.847	0.507308	394	43	311	5	301	4	268	4
IN-55	257.131	651.555	0.394641	440	24	331	3	316	2	266	4
IN-83	105.661	221.246	0.477574	319	33	319	4	319	2	261	4
IN-49	39.7769	85.7914	0.463647	610	52	359	7	321	3	265	6
IN-145	30.7024	64.2876	0.477579	422	51	334	6	321	4	274	5
IN-41	60.3942	132.623	0.455382	521	46	349	6	323	3	234	4
IN-167	80.539	211.514	0.380773	325	36	328	4	328	4	287	4
IN-80	23.21	101.637	0.22836	540	66	360	8	333	3	329	4
IN-31	323.203	588.251	0.549432	764	42	399	6	339	3	177	4
IN-87	43.8681	107.817	0.406875	318	69	336	8	339	4	265	7
IN-96	468.869	286.818	1.63473	321	36	338	4	341	2	279	5
IN-109	339.622	251.708	1.34927	393	33	350	4	344	2	261	3
IN-63	136.889	152.317	0.898711	360	31	355	4	354	2	303	4
IN-59	163.032	346.012	0.471176	407	27	363	3	356	2	289	4
IN-149	696.378	403.345	1.72651	367	31	359	4	357	4	290	3
Average (17)	184.26	252.34	0.67					328.5
IN-44	379.208	536.736	0.706508	426	21	391	3	385	2	283	3
IN-58	206.041	270.416	0.761944	564	22	453	3	431	3	352	4
IN-84	135.563	260.681	0.520035	500	24	449	4	439	3	386	5
IN-57	212.628	269.499	0.788975	658	34	488	6	452	3	331	5
IN-48	307.18	304.965	1.00726	448	37	454	6	455	3	268	5
IN-105	128.624	534.283	0.240742	452	25	455	4	455	3	353	5
IN-23	127.194	236.788	0.537165	441	24	459	4	462	3	378	4
IN-90	70.3377	162.411	0.433084	467	20	462	3	462	3	426	4
IN-56	144.67	245.608	0.589026	547	28	477	5	463	3	391	6
IN-72	107.566	264.718	0.406343	721	24	514	4	469	3	438	6
IN-126	195.251	264.04	0.739474	482	24	477	4	476	3	428	6
IN-22	107.419	180.227	0.596019	498	25	483	4	480	3	413	5
IN-21	63.2165	156.931	0.402829	516	23	488	4	482	3	434	5
IN-132	193.817	416.593	0.465242	547	26	501	5	491	3	411	7
IN-10	95.8425	213.499	0.448912	468	27	496	5	502	3	423	7
IN-117	219.3	188.333	1.16442	456	41	496	7	505	4	397	8
IN-92	101.402	138.82	0.730454	641	32	531	6	506	3	483	8
Average (17)	164.43	273.21	0.62					465.6
IN-139	47.7797	362.179	0.131923	568	28	554	6	550	6	548	8
IN-24	6.74456	21.6336	0.311763	397	136	549	24	587	11	913	38
IN-133	154.205	337.721	0.456605	679	29	651	7	643	7	616	8
IN-116	64.1745	155.358	0.413074	732	28	727	7	725	5	704	11
IN-33	792.827	1171.22	0.676923	704	32	746	8	761	5	412	9
IN-95	119.999	228.901	0.524241	743	23	765	6	772	5	664	10
IN-180	79.7119	106.333	0.749646	862	41	796	11	772	10	570	9
IN-50	413.269	612.864	0.674323	842	23	801	6	786	5	517	8
IN-25	389.764	813.265	0.479258	751	20	794	5	809	5	568	8
IN-20	25.5842	33.7142	0.758857	906	40	845	10	823	7	620	10
IN-28	247.987	267.969	0.92543	819	21	830	5	834	5	699	9
IN-71	18.2818	33.177	0.551039	1993	335	1433	125	1104	78	915	168
Average (12)	196.69	345.36	0.55					763.8
IN-05	308.164	500.505	0.615705	1766	27	1753	12	1741	12	1161	27
IN-17	154.154	201.084	0.766617	1794	24	1770	11	1750	11	1354	29
IN-78	423.106	457.63	0.92456	1813	19	1782	8	1755	10	1344	23
IN-09	122.364	131.294	0.931987	1807	88	1794	38	1779	31	906	61
IN-02	60.3537	103.461	0.583346	1838	23	1807	10	1780	11	1463	28
IN-67	314.155	601.459	0.522321	1818	19	1805	8	1793	10	1439	24
IN-42	101.207	202.094	0.500792	1749	16	1774	7	1796	10	1244	15
IN-45	131.425	423.303	0.310474	1816	15	1812	7	1809	9	1555	18
IN-143	167.577	234.977	0.713163	1835	22	1823	11	1812	18	1455	18
IN-01	100.976	253.608	0.398158	1854	15	1832	7	1813	9	1715	21
IN-111	242.559	311.264	0.779271	1845	14	1837	6	1830	9	1597	16
IN-29	149.006	326.453	0.456439	1815	17	1824	8	1833	10	1677	26
IN-91	248.758	344.309	0.722486	1806	18	1821	8	1834	10	1514	23
IN-129	232.905	445.566	0.522718	1804	20	1830	9	1852	11	1336	22
IN-131	255.392	438.709	0.582145	1826	18	1842	8	1856	10	1539	24
Average (15)	200.81	331.71	0.62					1802.2
IN-151	146.423	289.326	0.506083	2073	20	2037	10	2001	19	1630	18
IN-118	264.528	352.251	0.750964	2061	24	2040	11	2018	13	1297	26
IN-11	116.031	344.431	0.336877	2601	14	2539	8	2462	12	2061	27
Average (3)	175.66	328.67	0.53					2160.3

## Sheet: Macquarie University
U-Pb ages of xenogenic zircons from Ingashi dyke 1 (Iskra) obtained at Curtin University (Australia).
Spot Name	f206	U	Th	Th/U	Isotopic ratios				Age, Ma
	%	ppm	ppm		238U/206Pb	±1σ	207Pb/206Pb	±1σ	206Pb/238U		207Pb/206Pb
									(±1σ)		(±1σ)
ING1-1	0.282	87	128	1.53	2.58776	0.04685	0.12766	0.00124	2106 ± 33		2066 ± 17
ING1-2	0.054	258	299	1.2	2.75806	0.04694	0.11502	0.00082	1994 ± 29		1880 ± 13
ING1-3	1.309	93	34	0.38	19.9273	0.48118	0.04309	0.00592	316 ± 7		-162 ± 341
ING-3b	1.586	107	39	0.38	20.2252	0.43347	0.04629	0.00681	311 ± 7		13 ± 354
ING1-4	0.067	312	239	0.79	13.1745	0.33531	0.05675	0.00117	472 ± 12		482 ± 46
ING1-5	1.308	212	118	0.58	19.3547	0.40068	0.04312	0.00605	325 ± 7		-160 ± 349
ING-5b	0.517	131	105	0.83	17.8776	0.43544	0.05154	0.00351	351 ± 8		265 ± 156
ING1-6	0.804	177	75	0.44	20.6543	1.03062	0.05277	0.00204	305 ± 15		319 ± 88
ING-6b	0.553	152	57	0.39	21.3547	0.40525	0.05404	0.00466	295 ± 5		373 ± 194
ING1-7	2.012	79	110	1.43	18.9975	0.41049	0.03936	0.00545	331 ± 7		-392 ± 360
ING-7b	0.491	106	148	1.44	18.115	0.36929	0.05381	0.00322	346 ± 7		363 ± 135
ING-8	0.337	162	72	0.46	13.539	0.24898	0.05759	0.00187	459 ± 8		514 ± 71
ING-9		91	59	0.67	8.35146	0.1586	0.06923	0.00138	729 ± 13		906 ± 41
ING-9b		53	39	0.75	8.08774	0.17094	0.06788	0.00184	752 ± 15		865 ± 56
ING-9c	0.765	91	51	0.58	8.20872	0.15225	0.0589	0.00158	741 ± 13		563 ± 58
ING-10	0.554	95	48	0.52	13.7459	0.27078	0.06242	0.00417	453 ± 9		689 ± 142
ING-11	0.249	110	75	0.7	12.1063	0.23416	0.05613	0.00265	512 ± 10		458 ± 105
ING-11r	1.524	63	35	0.57	13.4871	0.32144	0.04506	0.00937	461 ± 11		-52 ± 506
ING-12	1.2	51	36	0.74	8.14588	0.18373	0.06313	0.00679	746 ± 16		713 ± 229
ING-12b	0.31	87	65	0.78	7.96317	0.1565	0.06577	0.00342	763 ±14		799 ± 109
ING-13		174	54	0.32	21.6811	0.40693	0.05947	0.00275	291 ± 5		584 ± 100
ING-13b	0.92	136	60	0.46	21.0858	0.42429	0.0442	0.00445	299 ± 6		-99 ± 247
ING-14	0.443	175	126	0.75	14.3395	0.25915	0.05418	0.00255	435 ± 8		378 ± 106
ING-15	0.28	85	33	0.41	20.5676	0.4745	0.05153	0.00859	306 ± 7		264 ± 383
ING-16		65	54	0.86	7.4306	0.15455	0.07258	0.00161	814 ± 16		1002 ± 45
ING-17	0.029	103	62	0.62	13.5135	0.35277	0.05439	0.003	460 ± 12		387 ± 124
ING-18	0.635	169	68	0.42	21.1785	0.3961	0.0497	0.00408	297 ± 5		181 ± 191
ING-19	0.049	2584	483	0.19	2.84293	0.04403	0.11313	0.00018	1943 ± 26		1850 ± 3
ING-20	0.137	510	494	1	14.0391	0.22719	0.05537	0.00083	444 ± 7		427 ± 33
ING-21	0.499	154	71	0.47	20.7345	0.38388	0.05179	0.00221	304 ± 5		276 ± 98
ING-22	0.022	412	93	0.23	2.34078	0.04231	0.16725	0.00128	2293 ± 35		2530 ± 13
ING-23		326	7	0.02	12.8136	0.21221	0.05721	0.00083	484 ± 8		499 ± 32
ING-24	0.029	633	302	0.49	13.5936	0.2178	0.05765	0.00052	458 ± 7		516 ± 20
ING-25		1118	1432	1.32	20.0781	0.31831	0.05257	0.00045	313 ± 5		310 ± 19
ING-26	0.201	2330	1183	0.52	19.5428	0.35823	0.05278	0.00053	322 ± 6		319 ± 23
ING-27	0.217	1665	184	0.11	3.15365	0.04898	0.11379	0.00043	1776 ± 24		1861 ± 7
ING-28	0.078	201	86	0.44	3.06181	0.05035	0.114	0.00072	1822 ± 26		1864 ± 11
ING-29	0.019	1097	275	0.26	3.06995	0.04854	0.11312	0.00029	1818 ± 25		1850 ± 5
ING-30	0.014	240	114	0.49	2.27657	0.03986	0.14888	0.00062	2347 ± 34		2333 ± 7
ING2-1	0.076	210	98	0.48	3.20199	0.05247	0.11561	0.00075	1752 ± 25		1889 ± 12
ING2-2	2.136	92	47	0.53	21.6078	0.46315	0.03873	0.00662	292 ± 6		-435 ± 449
ING2-3	0.412	148	76	0.53	14.8464	0.271	0.05324	0.00291	420 ± 7		339 ± 124
Note. Analyses conducted during a single session. 44 BR266 standard analyses yielded a 2s error of the mean of 0.48%/
f206 denotes the proportion (%) of non radiogenic 206Pb in total 206Pb. Ratios are reported as 204-corrected. Ages are reported as 204-corrected.
